# Supplementary material for: The effect of indium doping on the hydrogen evolution performance of g-C3N4 based photocatalysts
Source: Royal Society of Chemistry journal article supplement (doi:10.1039/d0nj04854b), 2020-11-25
Supplement: d0nj04854b1.pdf [file d0nj04854b1.pdf]

Electronic Supplementary Material (ESI) for New Journal of Chemistry.

## Effect of Indium Doping on Hydrogen Evolution Performance of g-C<sub>3</sub>N<sub>4</sub> Based Photocatalysts

Xiaohang Yang,<sup>a</sup> Zilong Guo,<sup>b</sup> Xiaoyu Zhang,<sup>a</sup> Yandong Han,<sup>b</sup> Zheng Xue,<sup>b</sup> Tengfeng Xie<sup>a</sup> and Wensheng

Yang<sup>\*,a,b</sup>

<sup>a</sup> State Key Laboratory of Inorganic Synthesis and Preparative Chemistry, College of Chemistry, Jilin University, Changchun

130012, China

<sup>b</sup> Institute of Molecular Plus, Tianjin University, Tianjin 300072, China

E-mail: [wsyang@jlu.edu.cn](mailto:wsyang@jlu.edu.cn)

### Contents

|                                                                                                                           |    |
|---------------------------------------------------------------------------------------------------------------------------|----|
| 1. TEM images of the pristine g-C <sub>3</sub> N <sub>4</sub> and In-g-C <sub>3</sub> N <sub>4</sub> photocatalysts.      | S2 |
| 2. STEM image of the In-g-C <sub>3</sub> N <sub>4</sub> photocatalyst doped with 2.18 wt.% indium.                        | S2 |
| 3. Survey XPS spectra of the In-g-C <sub>3</sub> N <sub>4</sub> photocatalysts.                                           | S3 |
| 4. High resolution C 1s and O 1s XPS spectra of the In-g-C <sub>3</sub> N <sub>4</sub> photocatalysts.                    | S3 |
| 5. H <sub>2</sub> evolution over the In-g-C <sub>3</sub> N <sub>4</sub> photocatalyst during four cycles of the reactions | S4 |
| 6. Nitrogen adsorption-desorption isotherms of the In-g-C <sub>3</sub> N <sub>4</sub> photocatalysts.                     | S5 |
| 7. Tauc plots of the In-g-C <sub>3</sub> N <sub>4</sub> photocatalysts.                                                   | S6 |
| 8. Valence band XPS (VB-XPS) spectra of the In-g-C <sub>3</sub> N <sub>4</sub> photocatalysts.                            | S6 |
| 9. Photoluminescence spectra of the In-g-C <sub>3</sub> N <sub>4</sub> photocatalysts.                                    | S7 |
| 10. Comparison in photocatalytic activities of g-C <sub>3</sub> N <sub>4</sub> photocatalysts.                            | S7 |
| 11. Transient emission decays of the In-g-C <sub>3</sub> N <sub>4</sub> photocatalysts.                                   | S8 |

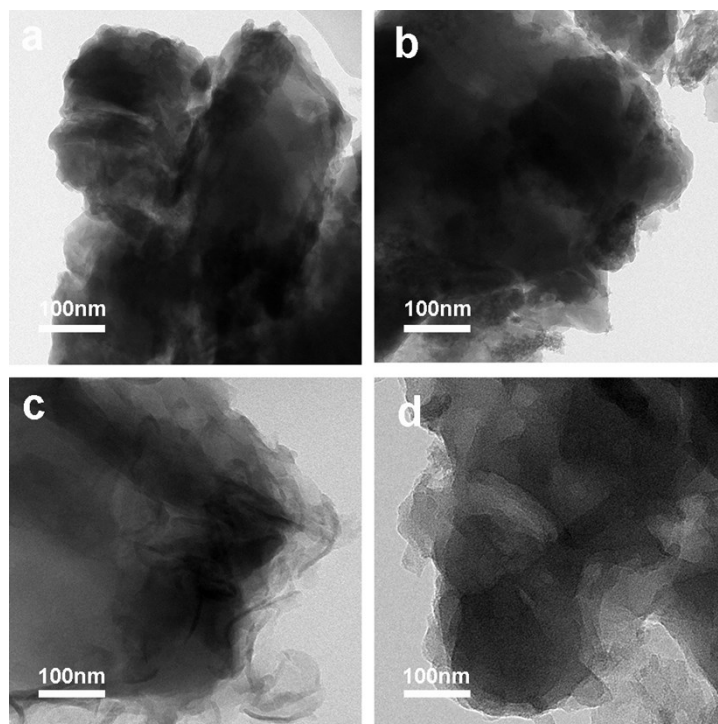

**Fig. S1** TEM images of the (a) pristine g-C<sub>3</sub>N<sub>4</sub> and In-g-C<sub>3</sub>N<sub>4</sub> photocatalysts doped with (b) 0.52 wt.%, (c) 1.15 wt.% and (d) 2.21 wt.% indium. All the samples presented the similar sheet-like structure, meaning the doping of indium had little effect on layered structure of the g-C<sub>3</sub>N<sub>4</sub>.

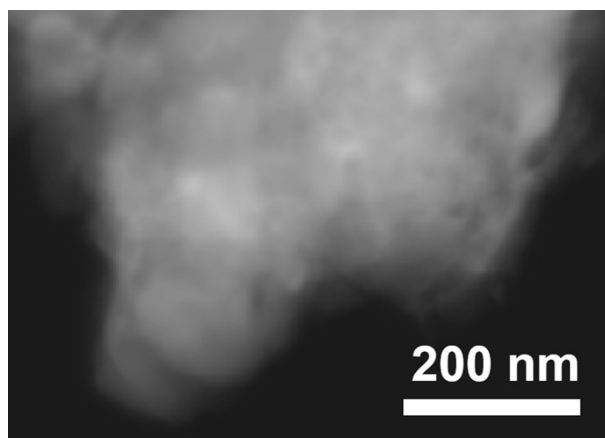

**Fig. S2** High-annular dark-field scanning transmission electron microscopy (STEM) image of the In-g-C<sub>3</sub>N<sub>4</sub> photocatalyst doped with 2.18 wt.% indium, corresponding to the elemental mapping images shown in Fig. 1b–e.

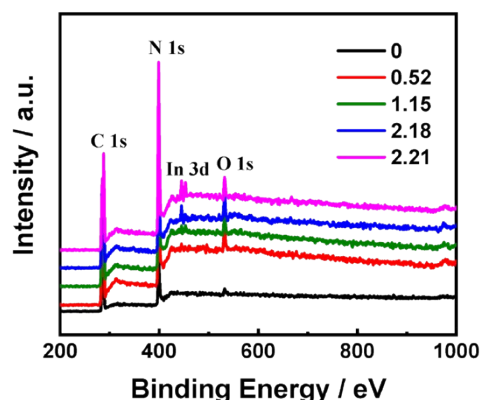

**Fig. S3** Survey XPS spectra of the pristine  $g\text{-C}_3\text{N}_4$  and  $\text{In-g-C}_3\text{N}_4$  photocatalysts doped by 0.52, 1.15, 2.18 and 2.21 wt.% indium. Intensity of the C1s and N1s peaks kept less changed, while that of In and O gradually increased with the increased amount of In doped. The atomic ratio of O to C (O/C) increased from 3.09% to 6.76%, 7.63%, 10.34% and 12.7% when the amount of indium doped increased from 0 to 0.52, 1.15, 2.18 and 2.21 wt.%, attributed to the increased surface areas of the photocatalyst with the increased amount of In doped (see Fig. S6).

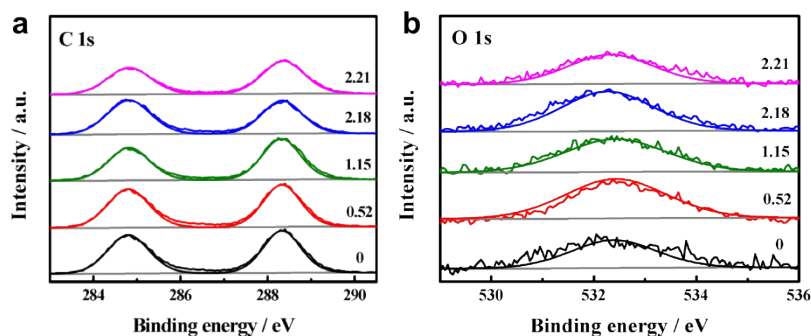

**Fig. S4** High resolution XPS spectra (a) C 1s and (b) O 1s of the pristine  $g\text{-C}_3\text{N}_4$  and  $\text{In-g-C}_3\text{N}_4$  photocatalysts doped with 0.52, 1.15, 2.18 and 2.21 wt.% indium. The C 1s peaks at 288.4 and 284.8 eV in the pristine  $g\text{-C}_3\text{N}_4$ , assigned to the C-N-C and C-C groups, as well as the O 1s peak centered at 532.5 eV, ascribed to the adsorbed oxygen, experienced negligible shift upon the doping of indium, implying that there were no interactions between indium with the C and O atoms in the  $\text{In-g-C}_3\text{N}_4$ .

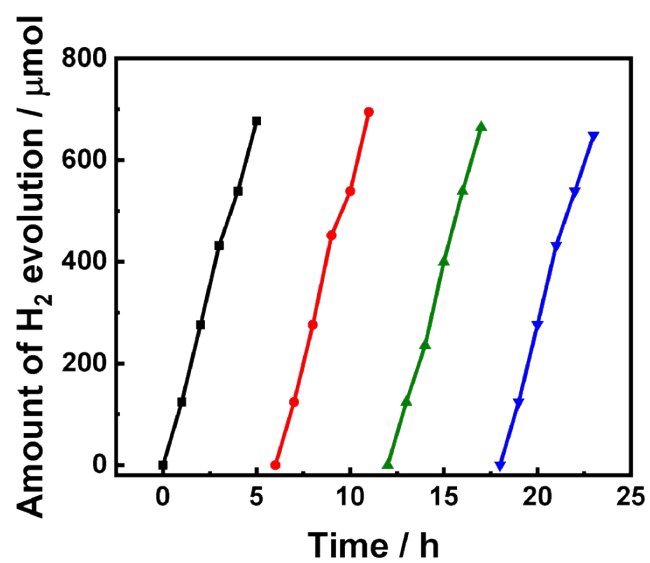

**Fig. S5** Variations in H<sub>2</sub> evolution over the In-g-C<sub>3</sub>N<sub>4</sub> photocatalyst doped with 2.18 wt.% indium during four cycles of the reactions. The almost unchanged H<sub>2</sub> evolution rate after the four cycles indicated the good stability of the photocatalyst.

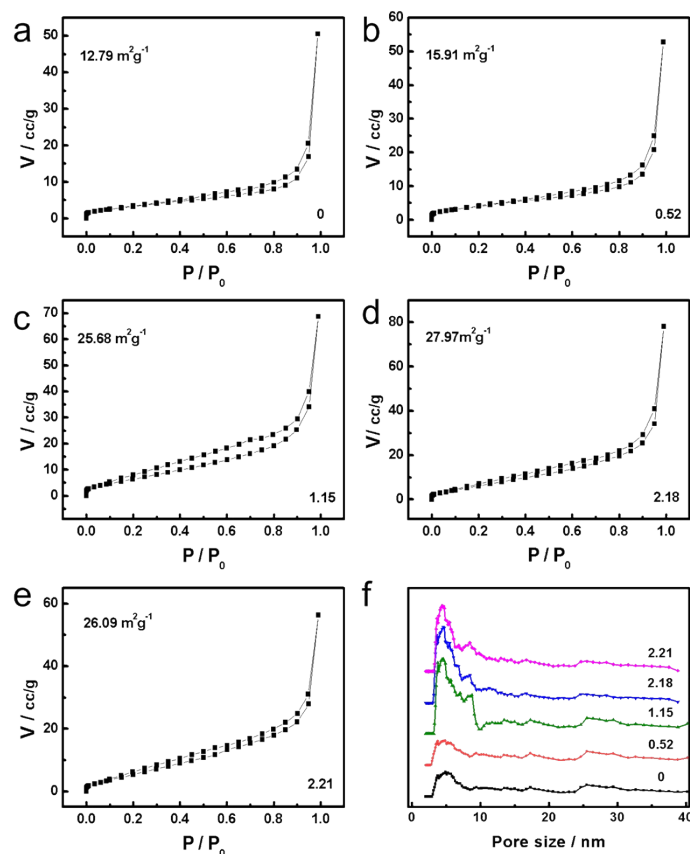

**Fig. S6** Nitrogen adsorption-desorption isotherms of the In-g-C<sub>3</sub>N<sub>4</sub> photocatalysts doped with (a) 0 wt.%, (b) 0.52 wt.%, (c) 1.15 wt.%, (d) 2.18 wt.% and (e) 2.21 wt.% indium and (f) the corresponding size distribution curves. Surface areas of the In-g-C<sub>3</sub>N<sub>4</sub> photocatalysts were determined to be 12.79, 15.91, 25.68, 27.97 and 26.09 m<sup>2</sup>g<sup>-1</sup>, and their pore volumes were 0.07, 0.08, 0.11, 0.11 and 0.08 cm<sup>3</sup>g<sup>-1</sup> when the amounts of indium doped were 0, 0.52, 1.15, 2.18 and 2.21 wt.%. According to the derived pore size distribution plots (Fig. S5f), sizes of the mesopores in the pristine g-C<sub>3</sub>N<sub>4</sub> were primarily distributed in the range of 3–5 nm, while additional mesopores with sizes in the range of 8–9 nm were identified for the In doped photocatalysts. The In-g-C<sub>3</sub>N<sub>4</sub> photocatalysts doped with 1.15 and 2.18 wt.% indium presented comparable surface areas (25.68 and 27.97 m<sup>2</sup>·g<sup>-1</sup>) and the same pore volume (0.11 cm<sup>3</sup>·g<sup>-1</sup>) but very different H<sub>2</sub> evolution rates (0.39 and 1.35 mmol·h<sup>-1</sup>·g<sup>-1</sup>), suggesting that the differences in surface area and thus the amount of surface active sites are not the primary reason responsible for the improved photocatalytic activity.

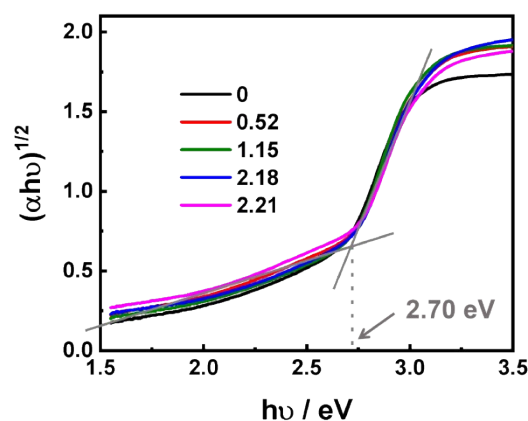

**Fig. S7** Tauc plots of the In-g-C<sub>3</sub>N<sub>4</sub> photocatalysts doped with 0, 0.52, 1.15, 2.18 and 2.21 wt.% indium derived from the UV-Vis spectra shown in Fig. 3b. The value reckoned from the X intercept at the tangent of Tauc plots (2.70 eV) corresponding to the band gap value ( $E_g$ ) of the semiconducting g-C<sub>3</sub>N<sub>4</sub>, which kept almost unchanged with the increased amount of indium doped, meaning the indium doping had little effect on band structure of g-C<sub>3</sub>N<sub>4</sub>.

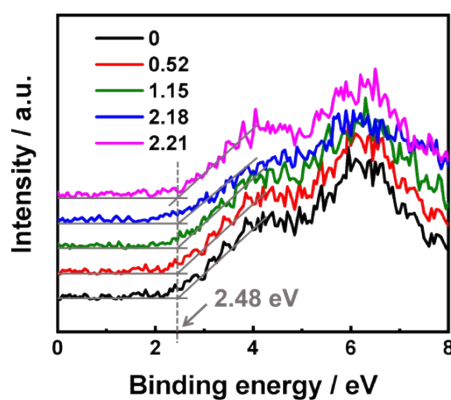

**Fig. S8** Valence band XPS (VB-XPS) spectra of the In-g-C<sub>3</sub>N<sub>4</sub> photocatalysts doped with 0, 0.52, 1.15, 2.18 and 2.21 wt.% indium. The valence band maximum (VBM) potential (2.48 eV) of the In-g-C<sub>3</sub>N<sub>4</sub> photocatalysts kept less changed with the amount of indium doped. Combined with the appropriate  $E_g$  value (ca. 2.70 eV), the conduction band minimum (CBM) of In-g-C<sub>3</sub>N<sub>4</sub> photocatalysts were calculated as -0.22 eV. Notably, In-g-C<sub>3</sub>N<sub>4</sub> photocatalysts exhibited comparable energy band structure, which further elucidated that the doping of indium had little effect on forbidden band width and reducing ability of the g-C<sub>3</sub>N<sub>4</sub>.

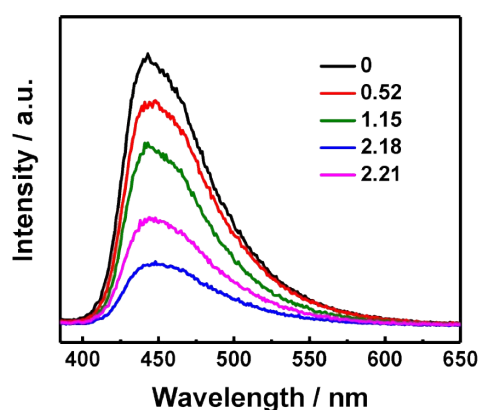

**Fig. S9** Photoluminescence spectra of the In- $g\text{-C}_3\text{N}_4$  photocatalysts with 0, 0.52, 1.15, 2.18 and 2.21 wt.% of doped indium. Intensity of the emission peak of  $g\text{-C}_3\text{N}_4$  at 447 nm decreased upon the doping of indium, indicating the doping of indium was effective to suppress the recombination of the photogenerated electron-hole pairs. The  $g\text{-C}_3\text{N}_4$  doped with 2.18 wt.% indium presented the lowest PL emission intensity, implying optimized separation efficiency of the photogenerated charge carriers, which was in consistent with the SPV result in Fig. 4c.

**Table S1** Comparison in visible light ( $\lambda > 420$  nm) photocatalytic activities of the  $\text{In}^{3+}$  doped  $g\text{-C}_3\text{N}_4$  with the typical transition or alkali metal ions doped  $g\text{-C}_3\text{N}_4$ .

| Catalyst                 | Doped ions                    | $\text{H}_2$ evolution rate<br>( $\text{mmol}\cdot\text{h}^{-1}\cdot\text{g}^{-1}$ ) | Ref.                |
|--------------------------|-------------------------------|--------------------------------------------------------------------------------------|---------------------|
| $g\text{-C}_3\text{N}_4$ | --                            | 0.08                                                                                 |                     |
| $g\text{-C}_3\text{N}_4$ | $\text{In}^{3+}$ (2.18 wt.%)  | 1.35                                                                                 | This work           |
| $g\text{-C}_3\text{N}_4$ | $\text{Co}^{2+}$ (0.46 wt.%)  | 0.45                                                                                 | Ref. 11 in the text |
| $g\text{-C}_3\text{N}_4$ | $\text{Zn}^{2+}$ (13.65 wt.%) | 0.30                                                                                 | Ref. 12 in the text |
| $g\text{-C}_3\text{N}_4$ | $\text{Mn}^{2+}$ (2.93 wt.%)  | 0.13                                                                                 | Ref. 14 in the text |
| $g\text{-C}_3\text{N}_4$ | $\text{Ni}^{2+}$ (20.55 wt.%) | 0.16                                                                                 | Ref. 15 in the text |
| $g\text{-C}_3\text{N}_4$ | $\text{Li}^+$ (0.83 wt.%)     | <0.20                                                                                | Ref. 19 in the text |
| $g\text{-C}_3\text{N}_4$ | $\text{Na}^+$ (1.20 wt.%)     | 0.37                                                                                 | Ref. 16 in the text |
| $g\text{-C}_3\text{N}_4$ | $\text{K}^+$ (2.30 wt.%)      | 0.24                                                                                 | Ref. 19 in the text |

**Table S2** Transient emission decays of the In-g-C<sub>3</sub>N<sub>4</sub> photocatalysts doped with different amount of indium.

| Samples                                        | Parameter<br>s | Lifetime (ns) | Relative<br>percentage (%) | Ave. $\tau$ /ns |
|------------------------------------------------|----------------|---------------|----------------------------|-----------------|
| g-C <sub>3</sub> N <sub>4</sub>                | $\tau_1$       | 13.37         | 41.33                      | 4.632           |
|                                                | $\tau_2$       | 2.26          | 41.50                      |                 |
|                                                | $\tau_3$       | 90.56         | 17.16                      |                 |
| In-g-C <sub>3</sub> N <sub>4</sub> (0.52 wt.%) | $\tau_1$       | 11.73         | 40.82                      | 4.041           |
|                                                | $\tau_2$       | 82.08         | 17.69                      |                 |
|                                                | $\tau_3$       | 1.97          | 41.49                      |                 |
| In-g-C <sub>3</sub> N <sub>4</sub> (1.15 wt.%) | $\tau_1$       | 1.88          | 43.08                      | 3.740           |
|                                                | $\tau_2$       | 10.84         | 40.01                      |                 |
|                                                | $\tau_3$       | 75.35         | 16.91                      |                 |
| In-g-C <sub>3</sub> N <sub>4</sub> (2.18 wt.%) | $\tau_1$       | 1.95          | 50.14                      | 3.411           |
|                                                | $\tau_2$       | 10.42         | 37.12                      |                 |
|                                                | $\tau_3$       | 82.02         | 12.74                      |                 |
| In-g-C <sub>3</sub> N <sub>4</sub> (2.21 wt.%) | $\tau_1$       | 12.15         | 40.00                      | 4.045           |
|                                                | $\tau_2$       | 81.81         | 16.79                      |                 |
|                                                | $\tau_3$       | 2.03          | 43.20                      |                 |
